# Supplementary material
Source: PubMed Central journal article supplement (PMC8936931)
Supplement: bmjstel-2018-000374supp001.pdf [file bmjstel-2018-000374supp001.pdf]

## Appendix

In the transcripts, a simplified version of Jeffersonian notation is used.<sup>34</sup>

|                   |                    |                                                                               |
|-------------------|--------------------|-------------------------------------------------------------------------------|
| [ text ]          | Brackets           | Indicates the start and end points of overlapping speech.                     |
| (# of seconds)    | Timed pause        | A number in parentheses indicates the time, in seconds, of a pause in speech. |
| (.)               | Micropause         | A brief pause, usually less than 0.2 seconds.                                 |
| ↓                 | Down arrow         | Indicates falling pitch.                                                      |
| ↑                 | Up arrow           | Indicates rising pitch.                                                       |
| °                 | Degree symbol      | Indicates whisper or reduced volume speech.                                   |
| ALL CAPS          | Capitalized text   | Indicates shouted or increased volume speech.                                 |
| <u>underline</u>  | Underlined text    | Indicates the speaker is emphasizing or stressing the speech.                 |
| ( text )          | Parentheses        | Speech which is unclear or in doubt in the transcript.                        |
| (( italic text )) | Double Parentheses | Annotation of non-verbal activity.                                            |
